# Supplementary material for: An extreme high-performance ultraviolet photovoltaic detector based on a ZnO nanorods/phenanthrene heterojunction
Source: Royal Society of Chemistry journal article supplement (doi:10.1039/c5ra25059e), 2016-01-01
Supplement: c5ra25059e1.pdf [file c5ra25059e1.pdf]

Electronic Supplementary Information (ESI) for RSC Advances.  
This journal is © The Royal Society of Chemistry 2016

# An extreme high-performance ultraviolet photovoltaic detector based on ZnO nanorods/phenanthrene heterojunction

Wentao Cheng,<sup>a</sup> Libin Tang,<sup>\*a,b</sup> Jinzhong Xiang,<sup>\*a</sup> Rongbin Ji,<sup>\*b</sup> and Jun Zhao<sup>b</sup>

<sup>a</sup>School of Physical Science and Technology, Yunnan University, Kunming, 650091, P. R. China.  
Email: scitang@163.com, jzhxiang@ynu.edu.cn.

<sup>b</sup>Kunming Institute of Physics, Kunming, 650223, P. R. China. Email: scitang@163.com, jirongbin@gmail.com.

## • Chemicals:

Acetone (99%) was purchased from Chongqing Chuandong Chemical Co., Ltd., ethanol (99%) and glacial acetic acid (99%) were purchased from Tianjin Zhiyuan Chemical Reagent Co., Ltd., ethanamine (99%) and hexamethylenamine (99%) were purchased from Tianjin Fengchuan Chemical Reagent Technologies Co., Ltd., ethylene glycol was purchased from Tianjin Guangfu Fine Chemical Research Institute.

## • The effect of Phen concentration on device performance

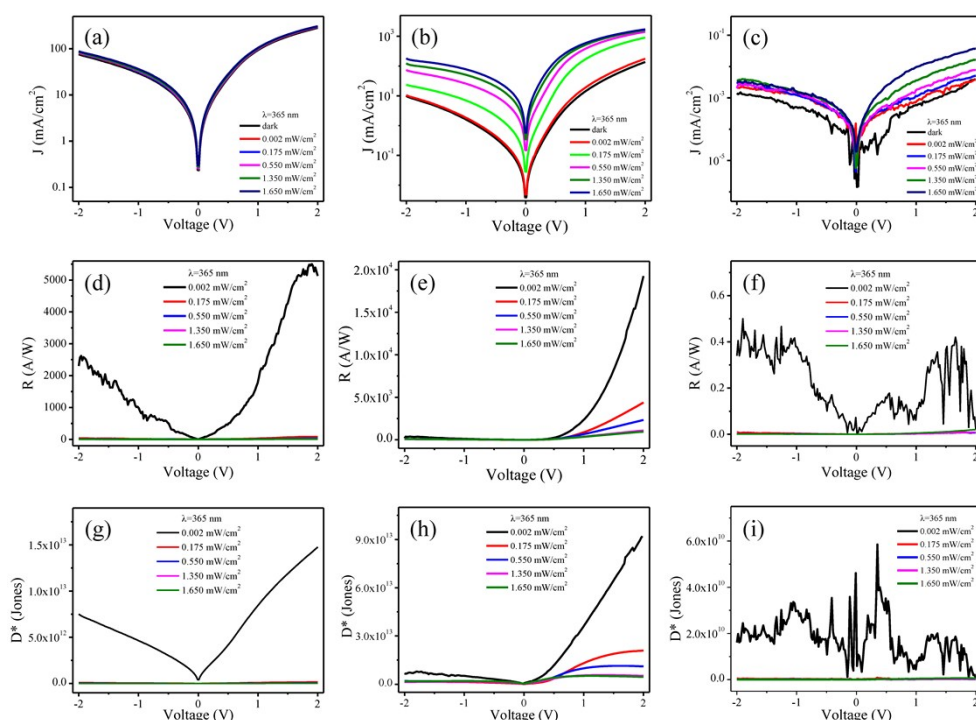

**Figure S1.** The effect of Phen concentration on device performance. Devices A((a),(d) and(g)), B((b),(e) and(h)) and C((c),(f) and(i)) were fabricated using Phen solutions with 0.5, 2.5, 10.0 g L<sup>-1</sup>, respectively.

A number of Phen solutions (0.5, 2.5 and 10 g L<sup>-1</sup>) were used to fabricate ZnO/Phen UV OPV detectors as shown in Figure S1, the responsivity ( $R$ ) and detectivity ( $D^*$ ) of device A (0.5 g L<sup>-1</sup>) are larger than device C (10.0 g L<sup>-1</sup>), but smaller than device B (2.5 g L<sup>-1</sup>), showing that the best performance of the device (device B) should have a proper ratio of Phen to ZnO nanorods, for the reason that the thinner Phen film(made from 0.5 g L<sup>-1</sup> solution) or the thicker Phen film (made from 10.0 g L<sup>-1</sup> solution) are not effective for the photon-absorption(thinner film), the transport and collection of photon-generated carriers(thicker film). Therefore, only a proper thickness of Phen (device B, made from 2.5 g L<sup>-1</sup> solution) may get the high performance.

#### • The performance of ZnO/Phen UV OPV detector

**Table S1.** The performance comparison of the ZnO Nanorods/Phen UV detector with some common UV detectors.

| Detectors         | Detectivity<br>(cm Hz <sup>1/2</sup> W <sup>-1</sup> ) | References |
|-------------------|--------------------------------------------------------|------------|
| GaN               | $1.23 \times 10^{10}$                                  | S1         |
| ZnO               | $1.04 \times 10^{12}$                                  | S2         |
| Si PD             | $\sim 10^{12}$                                         | S3         |
| Polymer PD        | $3.90 \times 10^{10}$                                  | S3         |
| NPB:BAIq          | $8.26 \times 10^{11}$                                  | S4         |
| BCP               | $9.02 \times 10^{11}$                                  | S5         |
| ZnO Nanorods/Phen | $9.0 \times 10^{13}$                                   | This work  |

## REFERENCES

- <sup>S1</sup> O. Katz, V. Garber, B. Meyler, G. Bahir and J. Salzman, *Appl. Phys. Lett.*, 2002, **80**, 347–349.
- <sup>S2</sup> S. J. Young, L. W. Ji, S. J. Chang and Y. K. Su, *J. Cryst. Growth*, 2006, **293**, 43–47.
- <sup>S3</sup> X. Gong, M. H. Tong, Y. J. Xia, W. Z. Cai, J. S. Moon, Y. Cao, G. Yu, C. L. Shieh, B. Nilsson and A. J. Heeger, *Science*, 2009, **325**, 1665–1667.
- <sup>S4</sup> L. Zhu, Q. Dai, Z. F. Hu, X. Q. Zhang and Y. S. Wang, *IEEE Photonics Technol. Lett.*, 2011, **23**, 1835–1837.
- <sup>S5</sup> Y. H. Cai, L. B. Tang, J. Z. Xiang, R. B. Ji, J. Zhao, J. Yuan, Y. Duan, Y. B. Hu, Y. J. Tai and J. H. Zhao, *J. Appl. Phys.*, 2015, **118**, 124503.
